# Supplementary material for: Melatonin-Nrf2 Signaling Activates Peroxisomal Activities in Porcine Cumulus Cell-Oocyte Complexes
Source: PubMed Central journal article supplement (PMC7692444; doi:10.3390/antiox9111080), 2020-11-03
Supplement: antioxidants-09-01080-s001.pdf [file antioxidants-09-01080-s001.pdf]

Supplementary material

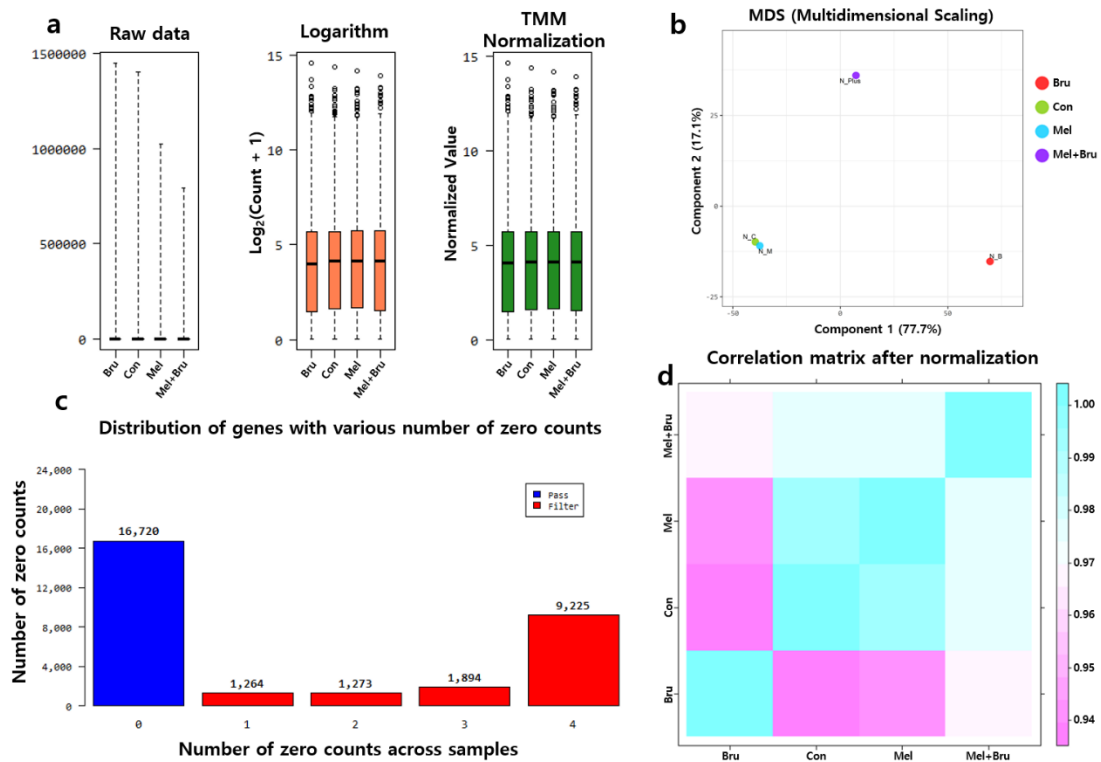

**Figure 1.** Raw data and trimmed read counts in porcine COCs from RNA sequencing. (a) the raw data from the COCs were processed by a series of data trimming up to data normalization, applying logarithm and TMM normalization. (b) The normalized data was first used for multidimensional scaling and (c) the quality control was performed for analyzing DEGs, then as the result, total 16,720 genes were mapped. (d) Lastly, a correlation among the genes were demonstrated as a matrix after data normalization. Con; control, Mel; melatonin, Bru; brusatol, and Mel+Bru; melatonin+brusatol.

**Table 1.** Raw data of sequencing from mature COCs.

| Group              | Total Read Bases* | Total Reads | GC (%) | Q20 (%) | Q30* (%) |
|--------------------|-------------------|-------------|--------|---------|----------|
| Control            | 8,351,726,158     | 82,690,358  | 52.03  | 97.95   | 94.27    |
| Melatonin          | 6,910,083,872     | 68,416,672  | 51.83  | 98.21   | 94.93    |
| Brusatol           | 7,250,491,242     | 71,787,042  | 48.24  | 98.29   | 94.80    |
| Melatonin+Brusatol | 6,150,647,904     | 60,897,504  | 51.65  | 98.23   | 94.81    |

\* Total read bases - Calculated by 'Total reads × Read length'. \* Q30 (%): Ratio of bases that have better quality than Phred quality score 30.

**Table 2.** Trimmed data of sequencing from mature COCs.

| Group              | Total Read Bases* | Total Reads | GC (%) | Q20 (%) | Q30* (%) |
|--------------------|-------------------|-------------|--------|---------|----------|
| Control            | 8,136,781,932     | 81,169,626  | 52.02  | 98.58   | 95.12    |
| Melatonin          | 6,746,869,394     | 67,271,268  | 51.84  | 98.80   | 95.72    |
| Brusatol           | 7,121,678,665     | 70,894,536  | 48.24  | 98.71   | 95.39    |
| Melatonin+Brusatol | 6,027,897,479     | 60,032,956  | 51.66  | 98.72   | 95.49    |

\* Total read bases - Calculated by 'Total reads × Read length'. \* Q30 (%) : Ratio of bases that have better quality than Phred quality score 30.

**Table 3.** Result of mapped data from cDNA fragments.

| Group              | Number of processed reads* | Number of mapped reads* (%) | Number of unmapped reads (%) |
|--------------------|----------------------------|-----------------------------|------------------------------|
| Control            | 81,169,626                 | 79,230,444<br>(97.61)       | 1,939,537<br>(2.39)          |
| Melatonin          | 67,271,268                 | 65,674,842<br>(97.63)       | 1,596,426<br>(2.37)          |
| Brusatol           | 70,894,536                 | 69,635,999<br>(98.22)       | 1,258,537<br>(1.78)          |
| Melatonin+Brusatol | 60,032,956                 | 58,858,650<br>(98.04)       | 1,174,306<br>(1.96)          |

\* Processed reads : Number of cleaned reads after data trimming.\* Mapped reads : Number of mapped reads according to the genomic DNA reference (GCF\_000003025.6\_Sscrofa 11.1).
